# Supplementary material for: Dynamics of Tryptophan Metabolic Pathways in Human Placenta and Placental-Derived Cells: Effect of Gestation Age and Trophoblast Differentiation
Source: Frontiers journal article supplement (doi:10.3389/fcell.2020.574034), 2020-09-18
Supplement: Data_Sheet_1.PDF [file Data_Sheet_1.PDF]

## *Supplementary Material*

### 1 Supplementary Tables

**Supplementary Table 1: List of predesigned probe assays analyzed by qPCR and ddPCR.**

| Gene symbol      | Gene name                                                                   | Gene alias  | Assay ID      |
|------------------|-----------------------------------------------------------------------------|-------------|---------------|
| <b>FAM Probe</b> |                                                                             |             |               |
| <i>IDO1</i>      | indoleamine 2,3-dioxygenase 1                                               | IDO-1       | Hs00984148_m1 |
| <i>IDO2</i>      | indoleamine 2,3-dioxygenase 2                                               | IDO-2       | Hs01589373_m1 |
| <i>TDO2</i>      | tryptophan 2,3-dioxygenase                                                  | TDO         | Hs00194611_m1 |
| <i>KMO</i>       | kynurenine 3-monooxygenase                                                  | -           | Hs00175738_m1 |
| <i>KYAT1</i>     | kynurenine aminotransferase 1                                               | CCBL1       | Hs00187858_m1 |
| <i>KYNU</i>      | kynureninase                                                                | -           | Hs01114105_m1 |
| <i>HAAO</i>      | 3-hydroxyanthranilate 3,4-dioxygenase                                       | 3-HAO       | Hs00895710_m1 |
| <i>QPRT</i>      | quinolinate phosphoribosyltransferase                                       | QPRTase     | Hs01547534_g1 |
| <i>TPH1</i>      | tryptophan hydroxylase 1                                                    | TRPH        | Hs00188220_m1 |
| <i>TPH2</i>      | tryptophan hydroxylase 2                                                    | NTPH        | Hs00542783_m1 |
| <i>PTS</i>       | 6-pyruvoyltetrahydropterin synthase                                         | PTPS        | Hs00609393_m1 |
| <i>SPR</i>       | sepiapterin reductase                                                       | -           | Hs00268403_m1 |
| <i>MAO-A</i>     | monoamine oxidase A                                                         | MAO-A       | Hs00165140_m1 |
| <i>MAO-B</i>     | monoamine oxidase B                                                         | -           | Hs01106246_m1 |
| <i>AANAT</i>     | aralkylamine N-acetyltransferase                                            | SNAT        | Hs01063208_g1 |
| <i>ASMT</i>      | acetylserotonin O-methyltransferase                                         | ASMTY       | Hs00187839_m1 |
| <i>SLC3A2</i>    | solute carrier family 3 member 2                                            | 4F2HC       | Hs00374243_m1 |
| <i>SLC6A4</i>    | solute carrier family 6 member 4                                            | SERT        | Hs00984349_m1 |
| <i>SLC7A5</i>    | solute carrier family 7 member 5                                            | LAT1        | Hs01001189_m1 |
| <i>SLC7A8</i>    | solute carrier family 7 member 8                                            | LAT2        | Hs00794796_m1 |
| <i>SLC22A3</i>   | solute carrier family 22 member 3                                           | OCT3        | Hs01009571_m1 |
| <i>TBP</i>       | TATA-box binding protein                                                    | GTF2D       | Hs00427620_m1 |
| <i>YWHAZ</i>     | tyrosine 3-monooxygenase/tryptophan 5-monooxygenase activation protein zeta | 14-3-3-zeta | Hs01122445_g1 |

| Gene symbol      | Gene name            | Gene alias | Assay ID       |
|------------------|----------------------|------------|----------------|
| <b>HEX Probe</b> |                      |            |                |
| <i>B2M</i>       | beta-2-microglobulin | IMD43      | dHsaCPE5053101 |

TaqMan<sup>®</sup> FAM probe assays were obtained from Thermo Fisher Scientific, Waltham, MA, USA whereas HEX probe assay was obtained from BioRad, Hercules, CA, USA.

**Supplementary Table 2: List of antibodies used in Western Blot analysis.**

| Protein                   | Product name                               | Distributor              | Cat. No.  | Dilution |
|---------------------------|--------------------------------------------|--------------------------|-----------|----------|
| <b>Target proteins</b>    |                                            |                          |           |          |
| <b>SLC6A4</b>             | Rabbit anti-serotonin transporter antibody | Abcam                    | ab181034  | 1:500    |
| <b>SLC22A3</b>            | Rabbit anti-SLC22A3/OCT3 antibody          | Abcam                    | ab124826  | 1:10000  |
| <b>MAO-A</b>              | Rabbit anti-monoamine oxidase A antibody   | Abcam                    | ab126751  | 1:1000   |
| <b>IDO1</b>               | Rabbit anti-IDO1 antibody                  | Thermo Fisher Scientific | PA5-79437 | 1:1000   |
| <b>TPH1</b>               | Rabbit anti-TPH1 antibody                  | Thermo Fisher Scientific | PA1-777   | 1:500    |
| <i>Secondary antibody</i> | Swine anti-rabbit Immunoglobulins/HRP      | Dako                     | P0217     | 1:10000  |
| <b>Reference protein</b>  |                                            |                          |           |          |
| <b>β-actin</b>            | Mouse anti-beta actin antibody             | Abcam                    | ab8226    | 1:10000  |
| <i>Secondary antibody</i> | Rabbit anti-mouse Immunoglobulins/HRP      | Dako                     | P0260     | 1:10000  |

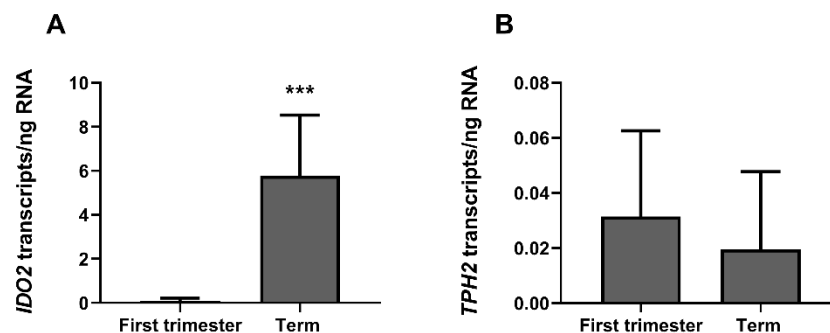

**Supplementary Figure 1: Transcript levels of *TPH2* (A) and *IDO2* (B) in human first trimester and term placenta.** Data are presented as mean  $\pm$  SD and statistical significance was evaluated using unpaired t-tests; \*\*\* ( $p \leq 0.001$ ).
